# Supplementary material
Source: Copernicus journal article supplement (doi:10.5194/os-22-1529-2026)
Supplement: Supplementary file 1 [file os-22-1529-2026-supplement.pdf]

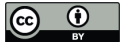

*Supplement of*

## **Cuban coral traces annual hydrologically driven variability in $\delta^{234}\text{U}$ values since the end of the Little Ice Age**

**Sahra Greve et al.**

*Correspondence to:* Sahra Greve ([sgreve@iup.uni-heidelberg.de](mailto:sgreve@iup.uni-heidelberg.de))

The copyright of individual parts of the supplement might differ from the article licence.

## Contents of this file

Mississippi Mass Calculation  
Figures S1 to S4  
Tables S1 to S2

### Mississippi Mass calculation

Considering the present-day strong seasonal variability in the U concentration and isotopic composition of the Mississippi River (Grzymko et al., 2007), it cannot be assumed that the uranium concentration and  $^{234}\text{U}/^{238}\text{U}$  activity ratio have behaved conservatively in the Mississippi River over the last 240 years. Binary isotope mixing according to Equation (S1) (Roy-Barman et al., 2016) was applied to estimate the potential fraction of the Mississippi River-derived U isotopes in the Gulf of Mexico throughflow.

$$f_r = \frac{\delta_c * C_c - \delta_{sw} * C_{sw}}{\delta_r * C_r - \delta_{sw} * C_{sw}} \quad (\text{S1})$$

Here,  $\delta_c$  is the coral  $\delta^{234}\text{U}$  ratio and  $C_c$  is the coral U concentration converted into the corresponding seawater concentration (assuming  $3.5 \mu\text{g/g} - 3.3 \mu\text{g/l}$  at 35,9 PSU). Any other influences on the U concentration, such as temperature, carbonate ion concentration and the coral growth rate, are neglected. Similarly,  $\delta_{sw}$  is the open ocean seawater  $\delta^{234}\text{U}$  ratio, and  $C_{sw}$  is its U concentration (presumed to be constant,  $[\text{U}]_{sw} \gg [\text{U}]_{river}$ ). Finally,  $\delta_r$  is the Mississippi  $\delta^{234}\text{U}$  ratio range, and  $C_r$  is the U concentration range. For this two end-member isotope system, the past seawater U concentration remains unknown but is likely to vary within small ranges of a few percent from modern values. To overcome this difficulty, we here used the mean coral U concentration ( $2.27 \mu\text{g/l}$ ) as a representative of seawater. Taking these limitations into account, the proportion of Mississippi River freshwater ( $f_r$ ) reaching the coral site during the LIA, where the highest  $\delta^{234}\text{U}$  ratios are recorded, is estimated to vary between 0% and 3.0%.

The seawater U concentration may vary independently of open ocean and freshwater mixing, due to evaporation, for example (Ivanovich & Harmon, 1992). Additionally, U incorporation during coral calcification may vary depending on the growth rate (Inoue et al., 2011), seawater pH (Inoue et al., 2011), carbonate ion concentration, dissolved inorganic carbon (DeCarlo et al., 2016; Patterson et al., 2021), and temperature (Ourbak et al., 2006; Patterson et al., 2021), causing subtle changes in the coral U concentration independent of the balance between seawater and freshwater. Consequently, any quantitative estimate will remain speculative without monitoring all the above aspects. Nonetheless, the Mississippi freshwater volume contribution to the Gulf of Mexico throughflow is currently less than a 0.5 ‰ in mass balance (Grzymko et al., 2007; Leaman et al., 1995), leading to subtle salt changes and minor changes in oxygen isotopes overprinted by net evaporation. Hence, we must assume that changes in the U concentration of seawater caused by the contribution of the Mississippi are minimal. Consequently, any observed variations in isotopic composition must reflect a major shift in the supply of U and/or an increase in the  $\delta^{234}\text{U}$  value of river discharge.

In summary, we suggest that the deviation of the Cuban coral  $\delta^{234}\text{U}$  values from a constant open ocean  $\delta^{234}\text{U}$  value is most likely driven by two independent excess U sources. First, the local runoff coupled with the variance in precipitation on the island of Cuba likely resulted in minor reductions in the U isotope values compared with the

open ocean mean values. The observed correlation between a decrease in isotopic composition and an increase in precipitation accounts for approximately 50% of the variability in the  $\delta^{234}\text{U}$  time series from 1850–present. At the end of the LIA period (1778-1846), when the climate cooled in the Northern Hemisphere and the tropical climate was unstable, a second process influenced the time variance of the coral  $\delta^{234}\text{U}$  values. Most likely, the distant influence of the excess  $^{234}\text{U}$  contribution from the Mississippi River into the strong persistent throughflow of the Caribbean current caused a moderate and punctuated strong increase in seawater and thus coral  $\delta^{234}\text{U}$ . Both local precipitation and distant freshwater runoff must influence the  $\delta^{234}\text{U}$  time variance and mean of the coral record. Here, these two distinct contributions did not modify the long-term average coral  $\delta^{234}\text{U}$  value, which is identical to the mean global ocean value. In addition, the variance in  $\delta^{234}\text{U}$  is less than  $\pm 3\text{‰}$  when the single elevated value in 1792 is excluded. This finding strongly constrains the expected variance in the initial  $\delta^{234}\text{U}$  values of fossil corals within the Caribbean.

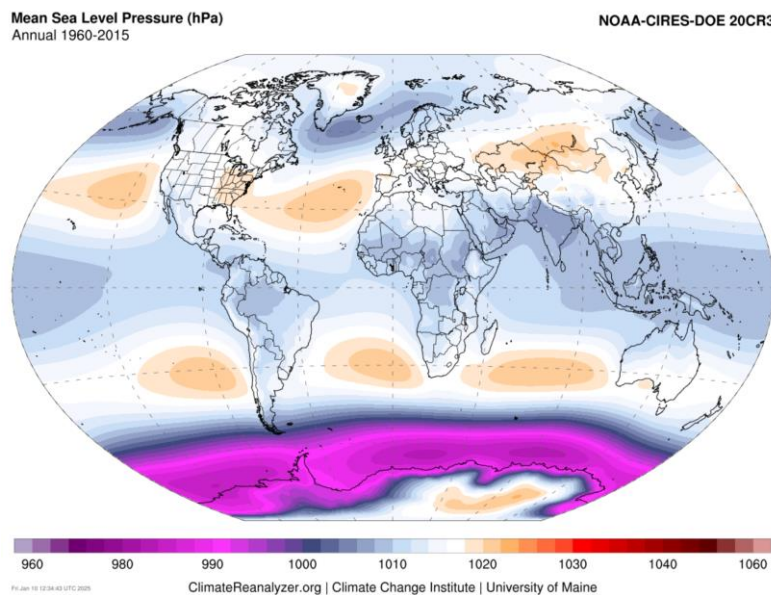

**Figure S1: Mean annual sea level pressure in hPa spanning 1960 – 2015 using NOAA-Cires-Doe 20CR3. Cuba lies on the southwestern edge of the high-pressure system over the Atlantic and is influenced by the extension of this pressure system.**

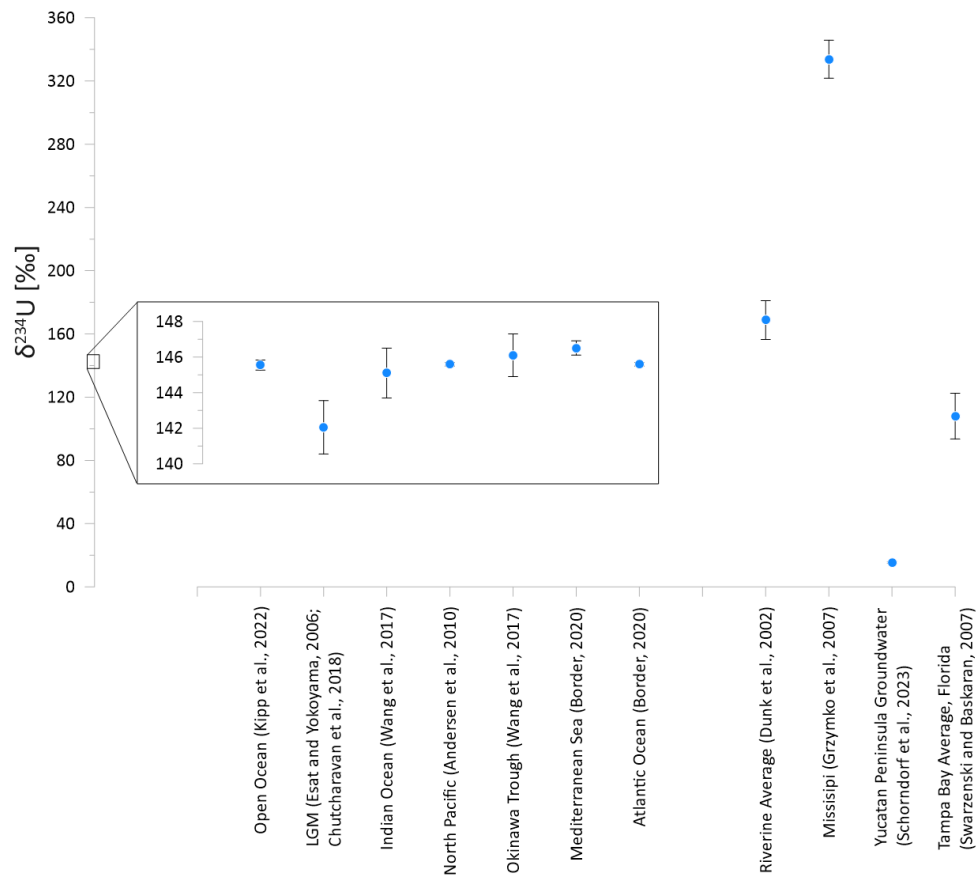

**Figure S2. Global and regional  $\delta^{234}\text{U}$  values compiled from modern marine, riverine, and groundwater sources. Marine values include open ocean, LGM reconstructions, and specific basins (e.g., Indian Ocean, Mediterranean Sea), showing  $\delta^{234}\text{U}$  generally between ~142‰ and 147‰. Riverine and groundwater sources display broader variability, with particularly high values observed in the Mississippi River and Yucatán Peninsula groundwater. A close-up inset highlights the narrow range of marine  $\delta^{234}\text{U}$  values relevant for comparison with proxy records.**

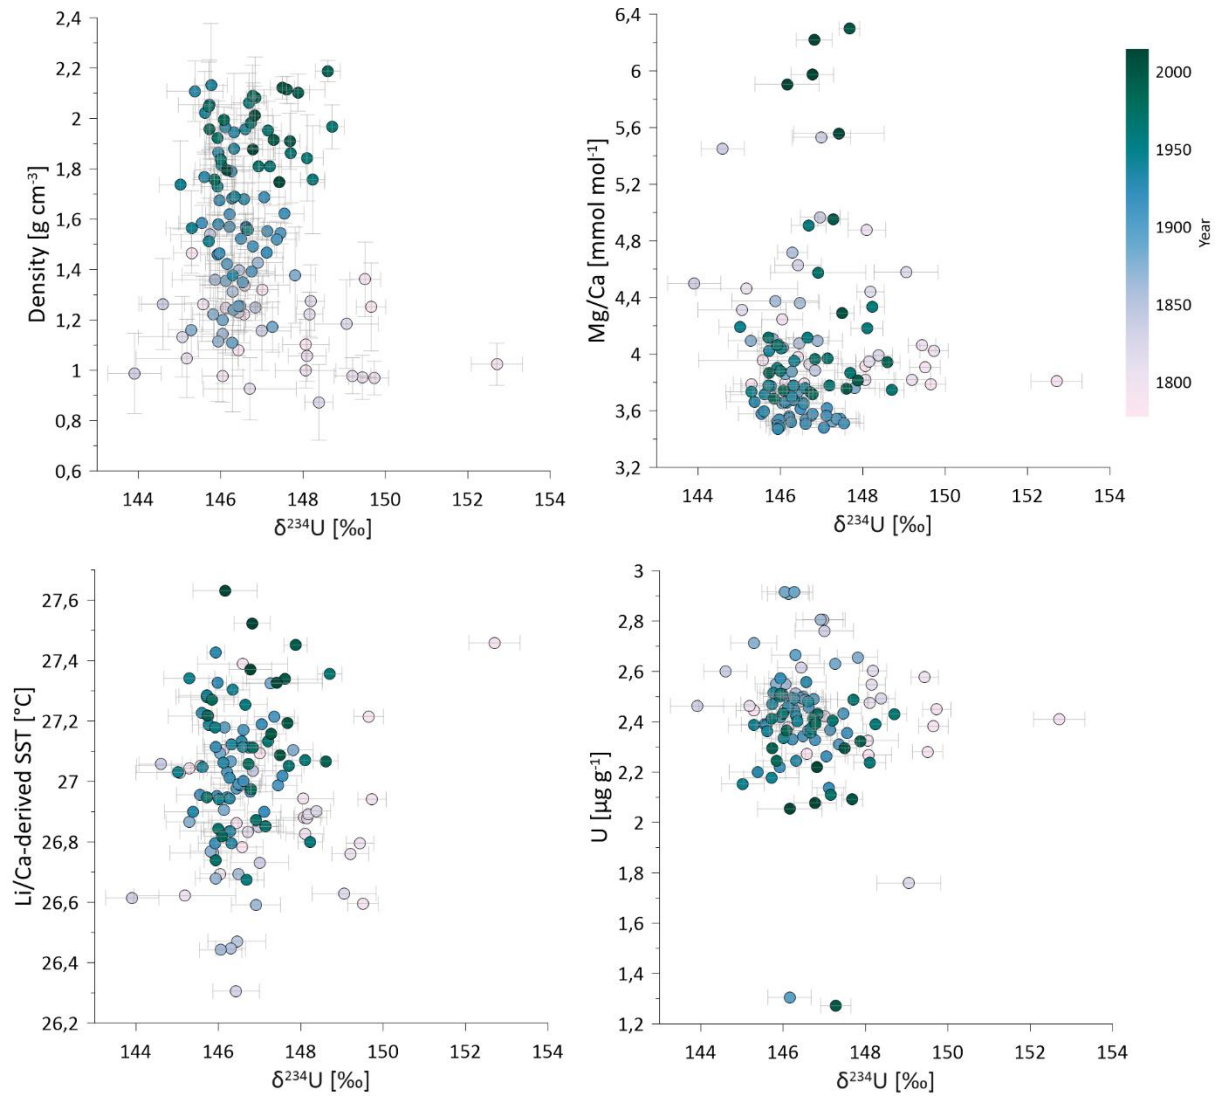

**Figure S3.** no correlation between the coral density, coral Mg/Ca, Li/Ca derived SST (Alonso-Hernández et al., 2022) or U concentration and  $\delta^{234}\text{U}$  values is visible, implying no  $\delta^{234}\text{U}$  signal variations due to vital effects or diagenesis. Colour scale denotes sample year.

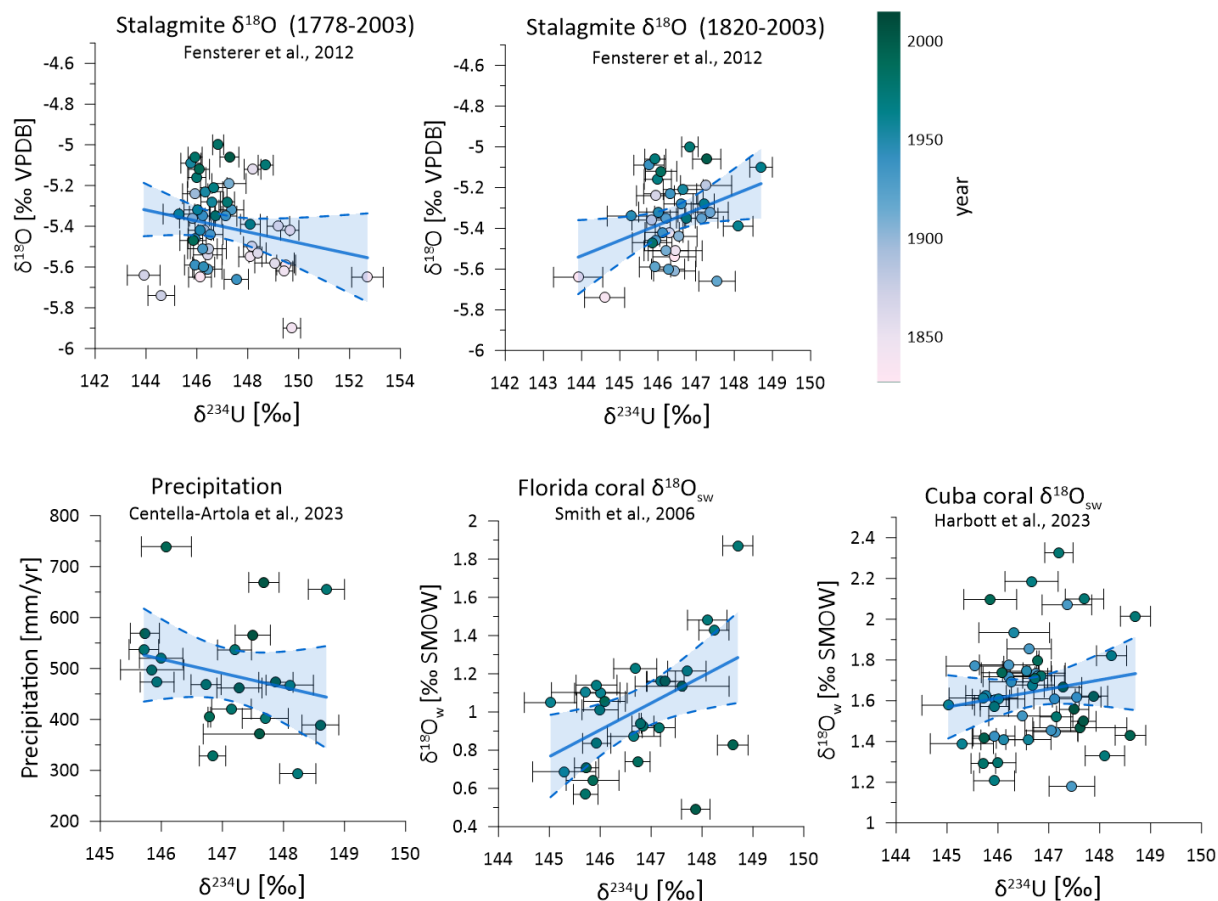

**Figure S4.** Correlations between  $\delta^{234}\text{U}$  and regional hydroclimate proxies over the past two centuries. Top panels show  $\delta^{18}\text{O}$  from stalagmites (Fensterer et al., 2012) plotted against  $\delta^{234}\text{U}$  for the full (1778–2003) and post-1820 intervals. Bottom panels compare  $\delta^{234}\text{U}$  with annual precipitation from the Cuban coast (Centella-Artola et al., 2023), and seawater  $\delta^{18}\text{O}$  from Florida (Smith et al., 2006) and Cuba (Harbott et al., 2023) coral records. Shaded regions indicate 95% confidence intervals around linear regressions. Colour scale denotes sample year.

**Table S1.**  $\delta^{234}\text{U}$  measurements together with concentrations of  $^{238}\text{U}$  and  $^{234}\text{U}$  of annually integrated CSM\_1.  $\delta^{234}\text{U}$  values are given normalised to  $\text{HU1} = 0$  and  $\text{HU1} \neq 0$  after (Cheng et al., 2013). Measurement uncertainties are  $2\sigma$  analytical errors

| Lab. # | Year | $\delta^{234}\text{U}$ (‰) | Error $\delta^{234}\text{U}$ (‰) | $^{234}\text{U}$ (pg/g) | Error $^{234}\text{U}$ (pg/g) | $^{238}\text{U}$ (μg/g) | Error $^{238}\text{U}$ (μg/g) |
|--------|------|----------------------------|----------------------------------|-------------------------|-------------------------------|-------------------------|-------------------------------|
| 12021  | 1777 | 146.02                     | 0.39                             | 152.59                  | 0.44                          | 2.42                    | 9.91E-05                      |
| 12037  | 1778 | 145.59                     | 0.51                             | 144.06                  | 0.70                          | 2.27                    | 3.50E-04                      |
| 12022  | 1780 | 147.09                     | 0.57                             | 143.30                  | 0.61                          | 2.27                    | 1.25E-04                      |
| 12038  | 1781 | 145.45                     | 0.97                             | 143.39                  | 1.55                          | 2.26                    | 7.63E-04                      |
| 12023  | 1783 | 145.14                     | 0.45                             | 151.19                  | 0.35                          | 2.38                    | 1.18E-04                      |
| 12039  | 1784 | 144.95                     | 0.48                             | 151.61                  | 0.55                          | 2.45                    | 1.40E-04                      |
| 12024  | 1786 | 148.67                     | 0.36                             | 151.17                  | 0.40                          | 2.38                    | 8.88E-05                      |
| 12040  | 1787 | 145.61                     | 1.09                             | 150.11                  | 1.18                          | 2.37                    | 5.47E-03                      |
| 12025  | 1789 | 148.53                     | 0.37                             | 145.86                  | 0.35                          | 2.28                    | 8.13E-05                      |
| 12041  | 1790 | 144.59                     | 1.56                             | 150.04                  | 2.86                          | 2.37                    | 1.02E-03                      |
| 12026  | 1792 | 151.72                     | 0.62                             | 152.70                  | 0.53                          | 2.41                    | 1.40E-04                      |
| 12042  | 1793 | 147.08                     | 0.74                             | 147.37                  | 1.37                          | 2.33                    | 5.26E-04                      |
| 12027  | 1795 | 148.75                     | 0.34                             | 154.70                  | 0.40                          | 2.45                    | 1.13E-04                      |
| 12043  | 1796 | 145.07                     | 0.50                             | 155.12                  | 0.75                          | 2.45                    | 3.23E-04                      |
| 12028  | 1798 | 148.46                     | 0.33                             | 162.69                  | 0.48                          | 2.58                    | 1.05E-04                      |

| Lab. # | Year | $\delta^{234}\text{U}$ (‰) | Error $\delta^{234}\text{U}$ (‰) | $^{234}\text{U}$ (pg/g) | Error $^{234}\text{U}$ (pg/g) | $^{238}\text{U}$ (μg/g) | Error $^{238}\text{U}$ (μg/g) |
|--------|------|----------------------------|----------------------------------|-------------------------|-------------------------------|-------------------------|-------------------------------|
| 12029  | 1801 | 147.12                     | 0.46                             | 158.76                  | 0.74                          | 2.48                    | 1.38E-04                      |
| 12045  | 1802 | 144.20                     | 1.24                             | 157.88                  | 2.06                          | 2.58                    | 3.62E-04                      |
| 12030  | 1804 | 148.22                     | 0.44                             | 154.93                  | 0.47                          | 2.46                    | 1.22E-04                      |
| 12047  | 1808 | 145.73                     | 1.13                             | 170.98                  | 2.01                          | 2.62                    | 3.16E-04                      |
| 12032  | 1810 | 147.18                     | 0.33                             | 159.03                  | 0.37                          | 2.55                    | 9.93E-05                      |
| 12033  | 1813 | 147.21                     | 0.33                             | 161.74                  | 0.56                          | 2.60                    | 1.22E-04                      |
| 12049  | 1814 | 144.09                     | 1.07                             | 163.12                  | 1.83                          | 2.59                    | 3.46E-04                      |
| 12034  | 1816 | 148.07                     | 0.78                             | 109.21                  | 0.58                          | 1.76                    | 1.08E-04                      |
| 12035  | 1819 | 147.40                     | 0.34                             | 156.45                  | 0.46                          | 2.49                    | 9.98E-05                      |
| 12085  | 1826 | 145.45                     | 0.57                             | 162.14                  | 0.39                          | 2.61                    | 1.08E-04                      |
| 12742  | 1830 | 144.57                     | 0.50                             | 162.89                  | 0.74                          | 2.65                    | 1.95E-04                      |
| 12086  | 1831 | 143.93                     | 0.64                             | 154.86                  | 0.83                          | 2.46                    | 1.91E-04                      |
| 12237  | 1833 | 146.02                     | 0.71                             | 174.42                  | 0.21                          | 2.76                    | 6.55E-05                      |
| 12743  | 1835 | 145.99                     | 0.49                             | 172.83                  | 0.69                          | 2.81                    | 1.68E-04                      |
| 12087  | 1836 | 143.62                     | 0.52                             | 160.43                  | 0.66                          | 2.60                    | 1.79E-04                      |
| 12238  | 1838 | 144.77                     | 0.97                             | 174.18                  | 0.23                          | 2.75                    | 8.20E-05                      |
| 12088  | 1841 | 145.86                     | 0.56                             | 152.50                  | 0.88                          | 2.43                    | 1.66E-04                      |
| 12089  | 1846 | 145.47                     | 0.71                             | 153.65                  | 1.00                          | 2.48                    | 2.23E-04                      |
| 12090  | 1851 | 145.31                     | 0.36                             | 156.02                  | 0.36                          | 2.51                    | 1.02E-04                      |
| 12091  | 1856 | 145.50                     | 0.47                             | 156.50                  | 0.59                          | 2.50                    | 1.39E-04                      |
| 12242  | 1858 | 144.89                     | 1.05                             | 173.50                  | 0.39                          | 2.74                    | 9.78E-05                      |
| 12092  | 1861 | 145.07                     | 0.51                             | 157.41                  | 0.63                          | 2.55                    | 1.50E-04                      |
| 12243  | 1863 | 145.93                     | 0.60                             | 178.40                  | 0.34                          | 2.81                    | 1.15E-04                      |
| 12093  | 1866 | 144.95                     | 0.50                             | 155.21                  | 0.50                          | 2.51                    | 1.15E-04                      |
| 12094  | 1871 | 144.84                     | 0.50                             | 158.06                  | 0.68                          | 2.55                    | 1.53E-04                      |
| 12245  | 1873 | 144.31                     | 0.56                             | 172.51                  | 1.01                          | 2.71                    | 2.39E-04                      |
| 12095  | 1876 | 146.83                     | 0.49                             | 164.82                  | 0.62                          | 2.66                    | 1.37E-04                      |
| 12246  | 1878 | 145.15                     | 0.51                             | 180.49                  | 0.80                          | 2.91                    | 1.85E-04                      |
| 12096  | 1881 | 146.28                     | 0.67                             | 161.91                  | 0.71                          | 2.63                    | 1.95E-04                      |
| 12247  | 1883 | 145.07                     | 0.56                             | 180.41                  | 0.55                          | 2.92                    | 1.54E-04                      |
| 12248  | 1888 | 145.29                     | 0.45                             | 181.79                  | 0.73                          | 2.91                    | 1.75E-04                      |
| 12098  | 1891 | 145.33                     | 0.58                             | 165.23                  | 0.37                          | 2.66                    | 1.16E-04                      |
| 12250  | 1898 | 145.17                     | 0.52                             | 108.21                  | 0.27                          | 1.31                    | 9.38E-05                      |
| 12009  | 1901 | 145.45                     | 0.55                             | 156.06                  | 0.64                          | 2.50                    | 1.42E-04                      |
| 12008  | 1903 | 145.56                     | 0.49                             | 154.28                  | 0.59                          | 2.49                    | 1.16E-04                      |
| 12007  | 1905 | 145.77                     | 0.58                             | 154.00                  | 0.52                          | 2.49                    | 1.28E-04                      |
| 12006  | 1907 | 146.47                     | 0.45                             | 151.55                  | 0.53                          | 2.43                    | 1.12E-04                      |
| 12005  | 1908 | 146.38                     | 0.49                             | 142.45                  | 0.54                          | 2.31                    | 1.31E-04                      |
| 12004  | 1909 | 145.63                     | 0.44                             | 153.61                  | 0.63                          | 2.46                    | 1.46E-04                      |
| 12003  | 1910 | 145.24                     | 0.58                             | 159.71                  | 0.89                          | 2.50                    | 1.92E-04                      |
| 12002  | 1911 | 145.79                     | 0.53                             | 147.50                  | 0.61                          | 2.33                    | 1.36E-04                      |
| 11850  | 1912 | 146.16                     | 0.43                             | 148.99                  | 0.60                          | 2.37                    | 1.23E-04                      |
| 12001  | 1913 | 145.51                     | 0.67                             | 148.97                  | 1.10                          | 2.34                    | 2.00E-04                      |
| 12000  | 1915 | 144.57                     | 0.57                             | 150.67                  | 0.58                          | 2.39                    | 1.39E-04                      |
| 11999  | 1916 | 145.24                     | 0.51                             | 147.05                  | 0.56                          | 2.33                    | 1.16E-04                      |
| 11851  | 1917 | 146.57                     | 0.48                             | 148.37                  | 0.50                          | 2.36                    | 1.31E-04                      |

| Lab. # | Year | $\delta^{234}\text{U}$ (‰) | Error $\delta^{234}\text{U}$ (‰) | $^{234}\text{U}$ (pg/g) | Error $^{234}\text{U}$ (pg/g) | $^{238}\text{U}$ (μg/g) | Error $^{238}\text{U}$ (μg/g) |
|--------|------|----------------------------|----------------------------------|-------------------------|-------------------------------|-------------------------|-------------------------------|
| 11998  | 1918 | 146.07                     | 0.52                             | 143.79                  | 0.58                          | 2.26                    | 1.33E-04                      |
| 11997  | 1919 | 144.94                     | 0.41                             | 140.69                  | 0.64                          | 2.22                    | 1.31E-04                      |
| 11996  | 1920 | 146.13                     | 0.41                             | 134.46                  | 0.47                          | 2.14                    | 1.08E-04                      |
| 11993  | 1921 | 144.99                     | 0.30                             | 154.46                  | 0.15                          | 2.50                    | 5.36E-05                      |
| 11852  | 1922 | 145.63                     | 0.44                             | 146.90                  | 0.33                          | 2.37                    | 1.40E-04                      |
| 11992  | 1923 | 144.96                     | 0.29                             | 160.20                  | 0.27                          | 2.57                    | 7.70E-05                      |
| 11991  | 1924 | 145.00                     | 0.22                             | 155.20                  | 0.15                          | 2.51                    | 5.02E-05                      |
| 11990  | 1925 | 145.28                     | 0.43                             | 151.19                  | 0.28                          | 2.44                    | 7.55E-05                      |
| 11853  | 1927 | 144.96                     | 0.21                             | 149.59                  | 0.11                          | 2.42                    | 4.40E-05                      |
| 11988  | 1928 | 144.62                     | 0.24                             | 147.59                  | 0.18                          | 2.39                    | 5.36E-05                      |
| 11987  | 1929 | 145.59                     | 0.48                             | 157.73                  | 0.64                          | 2.56                    | 1.52E-04                      |
| 11986  | 1930 | 144.40                     | 0.68                             | 138.11                  | 0.75                          | 2.20                    | 1.76E-04                      |
| 11985  | 1931 | 145.34                     | 0.36                             | 137.84                  | 0.40                          | 2.25                    | 9.71E-05                      |
| 11854  | 1932 | 145.13                     | 0.45                             | 152.45                  | 0.55                          | 2.46                    | 1.23E-04                      |
| 11984  | 1933 | 145.31                     | 1.23                             | 151.21                  | 1.44                          | 2.45                    | 3.10E-04                      |
| 11983  | 1935 | 145.29                     | 0.32                             | 153.59                  | 0.36                          | 2.49                    | 9.10E-05                      |
| 11982  | 1936 | 145.34                     | 0.69                             | 148.15                  | 1.05                          | 2.42                    | 2.56E-04                      |
| 11855  | 1937 | 144.75                     | 0.75                             | 154.36                  | 1.27                          | 2.47                    | 2.37E-04                      |
| 11981  | 1938 | 144.78                     | 0.40                             | 154.39                  | 0.53                          | 2.52                    | 1.16E-04                      |
| 11980  | 1939 | 144.64                     | 0.29                             | 145.61                  | 0.26                          | 2.36                    | 6.79E-05                      |
| 11979  | 1941 | 145.62                     | 0.44                             | 154.11                  | 0.57                          | 2.48                    | 1.29E-04                      |
| 11856  | 1942 | 145.36                     | 0.41                             | 147.62                  | 0.45                          | 2.40                    | 1.14E-04                      |
| 11978  | 1944 | 144.73                     | 0.67                             | 134.27                  | 0.53                          | 2.18                    | 1.22E-04                      |
| 11977  | 1945 | 144.31                     | 0.62                             | 150.82                  | 0.80                          | 2.39                    | 1.50E-04                      |
| 11976  | 1946 | 144.04                     | 0.52                             | 135.07                  | 0.60                          | 2.15                    | 1.28E-04                      |
| 11857  | 1947 | 145.03                     | 0.52                             | 145.84                  | 0.71                          | 2.33                    | 1.29E-04                      |
| 11970  | 1954 | 145.68                     | 0.52                             | 146.68                  | 0.50                          | 2.36                    | 1.06E-04                      |
| 11969  | 1955 | 144.95                     | 0.40                             | 155.47                  | 0.43                          | 2.50                    | 1.09E-04                      |
| 11859  | 1957 | 145.71                     | 0.42                             | 147.23                  | 0.29                          | 2.37                    | 9.13E-05                      |
| 11933  | 1959 | 147.25                     | 0.30                             | 152.74                  | 0.31                          | 2.39                    | 7.79E-05                      |
| 11932  | 1960 | 147.12                     | 0.39                             | 143.46                  | 0.32                          | 2.24                    | 8.29E-05                      |
| 11931  | 1963 | 147.72                     | 0.30                             | 168.75                  | 0.36                          | 2.43                    | 7.95E-05                      |
| 11930  | 1964 | 146.72                     | 0.38                             | 158.54                  | 0.53                          | 2.49                    | 1.29E-04                      |
| 11929  | 1965 | 146.22                     | 0.28                             | 151.70                  | 0.25                          | 2.41                    | 7.32E-05                      |
| 11861  | 1967 | 145.02                     | 0.36                             | 150.38                  | 0.23                          | 2.43                    | 6.55E-05                      |
| 11928  | 1968 | 146.17                     | 0.32                             | 133.64                  | 0.23                          | 2.11                    | 6.96E-05                      |
| 11927  | 1969 | 145.94                     | 1.16                             | 154.89                  | 1.65                          | 2.45                    | 3.22E-04                      |
| 11926  | 1970 | 144.73                     | 0.24                             | 152.46                  | 0.20                          | 2.41                    | 6.25E-05                      |
| 11925  | 1971 | 144.95                     | 0.28                             | 159.25                  | 0.22                          | 2.51                    | 6.76E-05                      |
| 11924  | 1973 | 145.86                     | 0.22                             | 153.26                  | 0.15                          | 2.43                    | 5.39E-05                      |
| 11923  | 1978 | 145.75                     | 0.25                             | 150.17                  | 0.22                          | 2.41                    | 6.08E-05                      |
| 11862  | 1981 | 145.81                     | 0.02                             | 147.22                  | 0.63                          | 2.39                    | 1.38E-04                      |
| 11864  | 1982 | 144.87                     | 0.52                             | 140.01                  | 0.57                          | 2.25                    | 1.42E-04                      |
| 11894  | 1985 | 145.10                     | 0.41                             | 146.10                  | 0.35                          | 2.36                    | 9.83E-05                      |
| 11893  | 1988 | 147.62                     | 0.30                             | 144.99                  | 0.35                          | 2.30                    | 8.93E-05                      |
| 11866  | 1992 | 144.75                     | 0.24                             | 142.36                  | 0.18                          | 2.29                    | 5.82E-05                      |

| Lab. # | Year | $\delta^{234}\text{U}$ (‰) | Error $\delta^{234}\text{U}$ (‰) | $^{234}\text{U}$ (pg/g) | Error $^{234}\text{U}$ (pg/g) | $^{238}\text{U}$ (μg/g) | Error $^{238}\text{U}$ (μg/g) |
|--------|------|----------------------------|----------------------------------|-------------------------|-------------------------------|-------------------------|-------------------------------|
| 11892  | 1994 | 146.90                     | 0.28                             | 145.25                  | 0.38                          | 2.32                    | 1.07E-04                      |
| 11867  | 1997 | 146.63                     | 0.92                             | 23.81                   | 0.04                          | 0.38                    | 1.35E-05                      |
| 11876  | 1998 | 146.30                     | 0.37                             | 79.18                   | 0.12                          | 1.27                    | 3.73E-05                      |
| 11875  | 1999 | 146.70                     | 0.25                             | 130.65                  | 0.19                          | 2.09                    | 6.30E-05                      |
| 11874  | 2003 | 146.52                     | 0.29                             | 143.38                  | 0.41                          | 2.30                    | 1.13E-04                      |
| 11873  | 2011 | 146.44                     | 1.10                             | 134.51                  | 1.58                          | 2.14                    | 2.99E-04                      |
| 11870  | 2012 | 145.18                     | 0.78                             | 129.87                  | 0.77                          | 2.05                    | 1.74E-04                      |
| 11872  | 2013 | 145.84                     | 0.44                             | 138.60                  | 0.47                          | 2.22                    | 9.95E-05                      |
| 11871  | 2014 | 145.79                     | 0.52                             | 130.13                  | 0.52                          | 2.08                    | 1.14E-04                      |

**Table S2.**  $\delta^{18}\text{O}_w$  of a coral from the Florida Keys (Smith et al., 2006) was calculated with the SST calculated from Sr/Ca ratios by using the equation  $Sr/Ca = -0.0282 * SST + 9.962$  (Smith et al., 2006) with this  $SST_{Sr/Ca}$ , the  $\delta^{18}\text{O}_w$  is calculated from the measured  $\delta^{18}\text{O}_c$  by  $\delta^{18}\text{O}_w = ((SST_{Sr/Ca} - 5.33)/4.519) + \delta^{18}\text{O}_c$  (Leder et al., 1996; Ren et al., 2003)

| year | $SST_{Sr/Ca}$ (°C) | $\delta^{18}\text{O}_w$ (‰ SMOW) |
|------|--------------------|----------------------------------|
| 2002 | 29.54              | 1.16                             |
| 2001 | 28.17              | 1.13                             |
| 2000 | 27.76              | 1.04                             |
| 1999 | 27.38              | 0.95                             |
| 1998 | 24.81              | 0.49                             |
| 1997 | 26.81              | 0.84                             |
| 1996 | 25.89              | 0.71                             |
| 1995 | 27.70              | 0.98                             |
| 1994 | 27.57              | 0.99                             |
| 1993 | 25.87              | 0.66                             |
| 1992 | 26.33              | 0.83                             |
| 1991 | 27.44              | 0.97                             |
| 1990 | 28.94              | 1.11                             |
| 1989 | 28.44              | 1.06                             |
| 1988 | 26.64              | 0.81                             |
| 1987 | 24.24              | 0.35                             |
| 1986 | 26.51              | 0.64                             |
| 1985 | 27.78              | 0.94                             |
| 1984 | 28.28              | 1.06                             |
| 1983 | 26.61              | 0.75                             |
| 1982 | 26.21              | 0.74                             |
| 1981 | 28.36              | 1.14                             |
| 1980 | 26.02              | 0.68                             |
| 1979 | 26.88              | 0.92                             |
| 1978 | 25.70              | 0.71                             |
| 1977 | 26.13              | 0.93                             |
| 1976 | 24.54              | 0.57                             |
| 1975 | 26.26              | 0.84                             |
| 1974 | 25.22              | 0.57                             |
| 1973 | 26.81              | 0.68                             |

| year | SST <sub>Sr/Ca</sub> (°C) | δ <sup>18</sup> O <sub>w</sub> (‰ SMOW) |
|------|---------------------------|-----------------------------------------|
| 1972 | 27.02                     | 0.92                                    |
| 1971 | 27.43                     | 1.01                                    |
| 1970 | 27.22                     | 0.99                                    |
| 1969 | 27.86                     | 1.16                                    |
| 1968 | 28.03                     | 1.21                                    |
| 1967 | 31.57                     | 1.87                                    |
| 1966 | 29.80                     | 1.49                                    |
| 1965 | 29.68                     | 1.37                                    |
| 1964 | 28.91                     | 1.48                                    |
| 1963 | 28.42                     | 1.43                                    |
| 1962 | 28.79                     | 1.47                                    |
| 1961 | 28.62                     | 1.23                                    |
| 1960 | 29.20                     | 1.40                                    |
| 1959 | 27.79                     | 1.14                                    |
| 1958 | 26.76                     | 0.87                                    |
| 1957 | 27.73                     | 1.07                                    |
| 1956 | 29.22                     | 1.42                                    |
| 1955 | 30.07                     | 1.56                                    |
| 1954 | 30.32                     | 1.52                                    |
| 1953 | 29.50                     | 1.22                                    |
| 1952 | 28.52                     | 1.21                                    |
| 1951 | 27.94                     | 1.10                                    |
| 1950 | 27.89                     | 1.05                                    |
| 1949 | 27.22                     | 0.69                                    |
| 1948 | 29.25                     | 1.10                                    |
| 1947 | 27.67                     | 0.92                                    |

- Alonso-Hernández, C. M., Gómez-Batista, M., Helguera Pedraza, Y., Hernández-Albernas, J., Rico-Esenaro, S. D., Ruiz-Fernández, A. C., Sánchez-Cabeza, J. A., Douville, E., & Montagna, P. (2022). Registro de temperatura superficial del mar (1778-2015) en *Orbicella faveolata* (Cnidaria: Scleractinia) del arrecife Cayo Santa María, Cuba. In (Vol. 42, pp. 37-53): *Revista de Investigaciones Marinas*.
- Centella-Artola, A., Bezanilla-Morlot, A., Serrano-Notivoli, R., Vazquez-Montenegro, R., Sierra-Lorenzo, M., & Chang-Dominguez, D. (2023). A new long term gridded daily precipitation dataset at high-resolution for Cuba (CubaPrec1). *Data Brief*, 48, 109294. <https://doi.org/10.1016/j.dib.2023.109294>
- Cheng, H., Lawrence Edwards, R., Shen, C.-C., Polyak, V. J., Asmerom, Y., Woodhead, J., Hellstrom, J., Wang, Y., Kong, X., Spötl, C., Wang, X., & Calvin Alexander, E. (2013). Improvements in 230Th dating, 230Th and 234U half-life values, and U–Th isotopic measurements by multi-collector inductively coupled plasma mass spectrometry. *Earth and Planetary Science Letters*, 371-372, 82-91. <https://doi.org/10.1016/j.epsl.2013.04.006>
- DeCarlo, T. M., Gaetani, G. A., Cohen, A. L., Foster, G. L., Alpert, A. E., & Stewart, J. A. (2016). Coral Sr–U thermometry. *Paleoceanography*, 31(6), 626-638. <https://doi.org/10.1002/2015pa002908>
- Fensterer, C., Scholz, D., Hoffmann, D., Spötl, C., Pajón, J. M., & Mangini, A. (2012). Cuban stalagmite suggests relationship between Caribbean precipitation and the Atlantic Multidecadal Oscillation during the past 1.3 ka. *The Holocene*, 22(12), 1405-1412. <https://doi.org/10.1177/0959683612449759>

- Grzymko, T. J., Marcantonio, F., McKee, B. A., & Mike Stewart, C. (2007). Temporal variability of uranium concentrations and  $^{234}\text{U}/^{238}\text{U}$  activity ratios in the Mississippi river and its tributaries. *Chemical Geology*, 243(3-4), 344-356. <https://doi.org/10.1016/j.chemgeo.2007.05.024>
- Harbott, M., Wu, H. C., Kuhnert, H., Jimenez, C., González-Díaz, P., & Rixen, T. (2023). A Warming Southern Gulf of Mexico: Reconstruction of Anthropogenic Environmental Changes From a *Siderastrea siderea* Coral on the Northern Coast of Cuba. *Paleoceanography and Paleoclimatology*, 38(12), e2023PA004717. <https://doi.org/https://doi.org/10.1029/2023PA004717>
- Inoue, M., Suwa, R., Suzuki, A., Sakai, K., & Kawahata, H. (2011). Effects of seawater pH on growth and skeletal U/Ca ratios of *Acropora digitifera* coral polyps. *Geophysical Research Letters*, 38(12), n/a-n/a. <https://doi.org/10.1029/2011gl047786>
- Ivanovich, M., & Harmon, R. S. (1992). *Uranium-series disequilibrium: applications to earth, marine, and environmental sciences*. 2. ed. Oxford (United Kingdom); Clarendon Press;. <https://doi.org/https://doi.org/> Other: ISBN: 0 19 854278 X GBN
- Leaman, K. D., Vertes, P. S., Atkinson, L. P., Lee, T. N., Hamilton, P., & Waddell, E. (1995). Transport, potential vorticity, and current/temperature structure across Northwest Providence and Santaren Channels and the Florida Current off Cay Sal Bank. *Journal of Geophysical Research: Oceans*, 100(C5), 8561-8569. <https://doi.org/https://doi.org/10.1029/94JC01436>
- Leder, J. J., Swart, P. K., Szmant, A. M., & Dodge, R. E. (1996). The origin of variations in the isotopic record of scleractinian corals: I. Oxygen. *Geochimica et Cosmochimica Acta*, 60(15), 2857-2870. [https://doi.org/https://doi.org/10.1016/0016-7037\(96\)00118-4](https://doi.org/https://doi.org/10.1016/0016-7037(96)00118-4)
- Ourbak, T., Corrège, T., Malaizé, B., Le Cornec, F., Charlier, K., & Peypouquet, J. P. (2006). A high-resolution investigation of temperature, salinity, and upwelling activity proxies in corals. *Geochemistry, Geophysics, Geosystems*, 7(3). <https://doi.org/10.1029/2005gc001064>
- Patterson, E., Eanes, S., Lancrete, P., Gothman, A., & Roback, P. (2021). Factors Controlling Coral Skeletal U/Ca Ratios with Implications for their Use as a Proxy for Past Ocean Conditions. *American Journal of Undergraduate Research*, 17(4), 3-17. <https://doi.org/10.33697/ajur.2020.031>
- Ren, L., Braddock, K. L., Gerard, M. W., Daniel, P. S., & Ove, H.-g. (2003). Deconvolving the  $\delta^{18}\text{O}$  seawater component from subseasonal coral  $\delta^{18}\text{O}$  and Sr/Ca at Rarotonga in the southwestern subtropical Pacific for the period 1726 to 1997. *Geochimica et Cosmochimica Acta*, 67(9), 1609-1621. [https://doi.org/https://doi.org/10.1016/S0016-7037\(02\)00917-1](https://doi.org/https://doi.org/10.1016/S0016-7037(02)00917-1)
- Roy-Barman, M., Jeandel, C., Roy-Barman, M., & Jeandel, C. (2016).  $^{129}\text{I}$  Radioactive and Radiogenic Isotopes. In *Marine Geochemistry: Ocean Circulation, Carbon Cycle and Climate Change* (pp. 0). Oxford University Press. <https://doi.org/10.1093/acprof:oso/9780198787495.003.0004>
- Smith, J. M., Quinn, T. M., Helmle, K. P., & Halley, R. B. (2006). Reproducibility of geochemical and climatic signals in the Atlantic coral *Montastraea faveolata*. *Paleoceanography*, 21(1). <https://doi.org/https://doi.org/10.1029/2005PA001187>
